# Supplementary material for: MiR-196-5p involvement in selenium deficiency-induced immune damage via targeting of NFκBIA in the chicken trachea
Source: Royal Society of Chemistry journal article supplement (doi:10.1039/d0mt00164c), 2020-08-31
Supplement: d0mt00164c2.pdf [file d0mt00164c2.pdf]

**Supplementary Table 2 Rotating component matrix (n = 6).**

|                | Component 1 | Component 2 |
|----------------|-------------|-------------|
| PPAR- $\gamma$ | 0.975       |             |
| PTGE           | -0.972      | -0.129      |
| COX2           | -0.970      |             |
| IL-4           | -0.969      |             |
| IkB $\alpha$   | 0.964       | -0.207      |
| SelN           | 0.961       | 0.198       |
| NF-kB          | -0.951      | -0.142      |
| iNOS           | -0.945      | -0.109      |
| IL-2           | 0.942       | -0.229      |
| IgY            | 0.936       | -0.288      |
| HO-1           | 0.931       | -0.200      |
| IFN- $\gamma$  | 0.916       |             |
| IkB $\beta$    | -0.870      | -0.389      |
| TNF- $\alpha$  | -0.847      | -0.451      |
| IL-1 $\beta$   | -0.835      | -0.385      |
| AvBD10         | 0.833       |             |
| IL-6           | -0.831      | -0.369      |
| Selp2          | 0.807       | 0.235       |
| Dio3           | 0.796       | 0.151       |
| SelW           | 0.792       | -0.201      |
| SelS           |             | 0.998       |
| SelH           |             | 0.996       |
| IgG            |             | 0.994       |
| SelM           |             | 0.994       |
| GPX7           | -0.113      | 0.991       |
| SelI           | -0.116      | 0.991       |
| SPS2           | -0.111      | 0.990       |

|       |        |       |
|-------|--------|-------|
| Selp1 | -0.139 | 0.990 |
| SelO  | -0.119 | 0.987 |
| GPX1  | 0.134  | 0.971 |
| Sepp1 | 0.207  | 0.965 |
| GPX3  | 0.379  | 0.894 |
| GPX4  | 0.354  | 0.862 |
| Sep15 | 0.513  | 0.838 |
| SelT  | 0.510  | 0.797 |
| Sepp1 | 0.554  | 0.763 |
| AvBD9 | -0.606 | 0.750 |
| IgA   | -0.595 | 0.719 |

---
